# Supplementary material
Source: ML conference proceedings conference paper supplement (https://proceedings.neurips.cc/paper_files/paper/2010/hash/3621f1454cacf995530ea53652ddf8fb-Abstract.html)
Supplement: Supplementary file [file 3621f1454cacf995530ea53652ddf8fb-Supplemental.zip]

# Proofs of the Theorems

Wei Wang and Zhi-Hua Zhou

National Key Laboratory for Novel Software Technology

Nanjing University, Nanjing 210093, China

{wangw, zhouzh}@lamda.nju.edu.cn

**Proof of Theorem 1.** Let  $Q_i = S_1^i \oplus S_2^i$ . First we prove that if each view  $X_v$  ( $v = 1, 2$ ) satisfies Tsybakov noise condition, i.e.,  $Pr_{x_v \in X_v}(|\varphi_v(x_v) - 1/2| \leq t) \leq C_3 t^{\lambda_3}$  for some finite  $C_3 > 0$ ,  $\lambda_3 > 0$  and all  $0 < t \leq 1/2$ , Tsybakov noise condition can also be met in  $Q_i$ , i.e.,  $\frac{Pr_{x_v \in Q_i}(|\varphi_v(x_v) - 1/2| \leq t)}{Pr(Q_i)} \leq C_4 t^{\lambda_4}$  for some finite  $C_4 > 0$ ,  $\lambda_4 > 0$  and all  $0 < t \leq 1/2$ . Suppose Tsybakov noise condition cannot be met in  $Q_i$ , then for  $C_* = \frac{C_3}{Pr(Q_i)}$  and  $\lambda_* = \lambda_3$ , there exists some  $0 < t_* \leq 1/2$  to satisfy that  $\frac{Pr_{x_v \in Q_i}(|\varphi_v(x_v) - 1/2| \leq t)}{Pr(Q_i)} > C_* t_*^{\lambda_*}$ . So we get

$$Pr_{x_v \in X_v}(|\varphi_v(x_v) - 1/2| \leq t) \geq Pr_{x_v \in Q_i}(|\varphi_v(x_v) - 1/2| \leq t) > C_* t_*^{\lambda_*}.$$

It is in contradiction with that  $X_v$  satisfies Tsybakov noise condition. Thus, we get that Tsybakov noise condition can also be met in  $Q_i$ . Without loss of generality, suppose that Tsybakov noise condition in all  $Q_i$  and  $X_v$  can be met for the same finite  $C_0$  and  $\lambda$ .

Since  $m_0 = \frac{256^k C}{C_1^2} (V + \log(\frac{16(s+1)}{\delta}))$ , according to Lemma 1 we know that  $d(S_v^0, S^*) \leq \frac{C_1}{16^k}$  with probability at least  $1 - \frac{\delta}{16(s+1)}$ . With  $d(S_v, S_v^*) \geq C_1 d_\Delta^k(S_v, S_v^*)$ , we get  $d_\Delta(S_v^0, S^*) \leq \frac{1}{16}$ . It is easy to find that  $d_\Delta(S_1^0 \cap S_2^0, S^*) \leq d_\Delta(S_1^0, S^*) + d_\Delta(S_2^0, S^*) \leq 1/8$  holds with probability at least  $1 - \frac{\delta}{8(s+1)}$ .

For  $i \geq 0$ ,  $m_{i+1}$  number of labels are queried randomly from  $Q_i$ . Thus, similarly according to Lemma 1 we have  $d_\Delta(S_1^{i+1} \cap S_2^{i+1} | Q_i, S^* | Q_i) \leq 1/8$  with probability at least  $1 - \frac{\delta}{8(s+1)}$ . Let  $T_v^{i+1} = S_v^{i+1} \cap \overline{Q_i}$  and  $\tau_{i+1} = \frac{Pr(T_1^{i+1} \oplus T_2^{i+1} - S^*)}{Pr(T_1^{i+1} \oplus T_2^{i+1})} - \frac{1}{2}$ , it is easy to get

$$Pr(S^* \cap (S_1^{i+1} \oplus S_2^{i+1}) | \overline{Q_i}) - Pr(\overline{S^*} \cap (S_1^{i+1} \oplus S_2^{i+1}) | \overline{Q_i}) = -2\tau_{i+1} Pr(S_1^{i+1} \oplus S_2^{i+1} | \overline{Q_i}).$$

Considering the non-degradation condition and  $d_\Delta(S_1^i \cap S_2^i | \overline{Q_i}, S^* | \overline{Q_i}) = d_\Delta(S_v^i | \overline{Q_i}, S^* | \overline{Q_i})$ , we calculate that

$$\begin{aligned} & d_\Delta(S_1^{i+1} \cap S_2^{i+1} | \overline{Q_i}, S^* | \overline{Q_i}) \\ &= \frac{1}{2} \left( d_\Delta(S_1^{i+1} | \overline{Q_i}, S^* | \overline{Q_i}) + d_\Delta(S_2^{i+1} | \overline{Q_i}, S^* | \overline{Q_i}) \right) + \frac{1}{2} Pr(S^* \cap (S_1^{i+1} \oplus S_2^{i+1}) | \overline{Q_i}) \\ & \quad - \frac{1}{2} Pr(\overline{S^*} \cap (S_1^{i+1} \oplus S_2^{i+1}) | \overline{Q_i}) \\ &\leq \frac{1}{2} \left( d_\Delta(S_1^i | \overline{Q_i}, S^* | \overline{Q_i}) + d_\Delta(S_2^i | \overline{Q_i}, S^* | \overline{Q_i}) \right) - \tau_{i+1} Pr(S_1^{i+1} \oplus S_2^{i+1} | \overline{Q_i}) \\ &= d_\Delta(S_1^i \cap S_2^i | \overline{Q_i}, S^* | \overline{Q_i}) - \tau_{i+1} Pr(S_1^{i+1} \oplus S_2^{i+1} | \overline{Q_i}). \end{aligned}$$

So we have

$$\begin{aligned} & d_\Delta(S_1^{i+1} \cap S_2^{i+1}, S^*) \\ &= d_\Delta(S_1^{i+1} \cap S_2^{i+1} | Q_i, S^* | Q_i) Pr(Q_i) + d_\Delta(S_1^{i+1} \cap S_2^{i+1} | \overline{Q_i}, S^* | \overline{Q_i}) Pr(\overline{Q_i}) \\ &\leq \frac{1}{8} Pr(Q_i) + d_\Delta(S_1^i \cap S_2^i | \overline{Q_i}, S^* | \overline{Q_i}) Pr(\overline{Q_i}) - \tau_{i+1} Pr((S_1^{i+1} \oplus S_2^{i+1}) \cap \overline{Q_i}). \end{aligned}$$

Considering  $d_{\Delta}(S_1^i \cap S_2^i | \overline{Q_i}, S^* | \overline{Q_i}) Pr(\overline{Q_i}) = Pr(S_1^i \cap S_2^i - S^*) + Pr(\overline{S_1^i} \cap \overline{S_2^i} - \overline{S^*})$ , we have

$$\begin{aligned} & d_{\Delta}(S_1^{i+1} \cap S_2^{i+1}, S^*) \\ & \leq Pr(S_1^i \cap S_2^i - S^*) + Pr(\overline{S_1^i} \cap \overline{S_2^i} - \overline{S^*}) + \frac{1}{8} Pr(S_1^i \oplus S_2^i) - \tau_{i+1} Pr((S_1^{i+1} \oplus S_2^{i+1}) \cap \overline{Q_i}). \end{aligned}$$

Similarly, we get

$$\begin{aligned} & d_{\Delta}(S_1^{i+1} \cup S_2^{i+1}, S^*) \\ & \leq Pr(S_1^i \cap S_2^i - S^*) + Pr(\overline{S_1^i} \cap \overline{S_2^i} - \overline{S^*}) + \frac{1}{8} Pr(S_1^i \oplus S_2^i) + \tau_{i+1} Pr((S_1^{i+1} \oplus S_2^{i+1}) \cap \overline{Q_i}). \end{aligned}$$

Let  $\gamma_i = \frac{Pr(S_1^i \oplus S_2^i - S^*)}{Pr(S_1^i \oplus S_2^i)} - \frac{1}{2}$ , we have

$$\begin{aligned} d_{\Delta}(S_1^i \cap S_2^i, S^*) &= d_{\Delta}(S_1^i \cap S_2^i | Q_i, S^* | Q_i) Pr(Q_i) + d_{\Delta}(S_1^i \cap S_2^i | \overline{Q_i}, S^* | \overline{Q_i}) Pr(\overline{Q_i}) \\ &= (1/2 - \gamma_i) Pr(S_1^i \oplus S_2^i) + Pr(S_1^i \cap S_2^i - S^*) + Pr(\overline{S_1^i} \cap \overline{S_2^i} - \overline{S^*}) \end{aligned}$$

and  $d_{\Delta}(S_1^i \cup S_2^i, S^*) = (1/2 + \gamma_i) Pr(S_1^i \oplus S_2^i) + Pr(S_1^i \cap S_2^i - S^*) + Pr(\overline{S_1^i} \cap \overline{S_2^i} - \overline{S^*})$ .

As in each round of the multi-view active learning some contention points of the two views are queried and added into the training set, the difference between the two views is decreasing, i.e.,  $Pr(S_1^{i+1} \oplus S_2^{i+1})$  is no larger than  $Pr(S_1^i \oplus S_2^i)$ .

**Case 1:** If  $|\tau_{i+1}| \leq \gamma_i$ , with respect to Definition 1, we have

$$\begin{aligned} \frac{d_{\Delta}(S_1^{i+1} \cup S_2^{i+1}, S^*)}{d_{\Delta}(S_1^i \cup S_2^i, S^*)} &\leq \frac{\frac{1}{8} Pr(S_1^i \oplus S_2^i) + |\tau_{i+1}| Pr(S_1^{i+1} \oplus S_2^{i+1}) + \frac{1}{\alpha} Pr(S_1^i \oplus S_2^i)}{(\frac{1}{2} + \gamma_i) Pr(S_1^i \oplus S_2^i) + \frac{1}{\alpha} Pr(S_1^i \oplus S_2^i)} \\ &\leq \frac{(\frac{1}{8} + \gamma_i) Pr(S_1^i \oplus S_2^i) + \frac{1}{\alpha} Pr(S_1^i \oplus S_2^i)}{(\frac{1}{2} + \gamma_i) Pr(S_1^i \oplus S_2^i) + \frac{1}{\alpha} Pr(S_1^i \oplus S_2^i)} \leq \frac{5\alpha + 8}{8\alpha + 8}; \end{aligned}$$

**Case 2:** If  $-|\tau_{i+1}| > \gamma_i$ , with respect to Definition 1, we have

$$\begin{aligned} \frac{d_{\Delta}(S_1^{i+1} \cap S_2^{i+1}, S^*)}{d_{\Delta}(S_1^i \cap S_2^i, S^*)} &\leq \frac{\frac{1}{8} Pr(S_1^i \oplus S_2^i) + |\tau_{i+1}| Pr(S_1^{i+1} \oplus S_2^{i+1}) + \frac{1}{\alpha} Pr(S_1^i \oplus S_2^i)}{(\frac{1}{2} + |\gamma_i|) Pr(S_1^i \oplus S_2^i) + \frac{1}{\alpha} Pr(S_1^i \oplus S_2^i)} \\ &\leq \frac{5\alpha + 8}{8\alpha + 8}; \end{aligned}$$

**Case 3:** If  $\tau_{i+1} \geq \gamma_i$  and  $0 \leq \gamma_i \leq \frac{1}{4}$ , with respect to Definition 1, we have

$$\begin{aligned} \frac{d_{\Delta}(S_1^{i+1} \cap S_2^{i+1}, S^*)}{d_{\Delta}(S_1^i \cap S_2^i, S^*)} &\leq \frac{\frac{1}{8} Pr(S_1^i \oplus S_2^i) + \frac{1}{\alpha} Pr(S_1^i \oplus S_2^i)}{(\frac{1}{2} - \gamma_i) Pr(S_1^i \oplus S_2^i) + \frac{1}{\alpha} Pr(S_1^i \oplus S_2^i)} \\ &\leq \frac{\alpha + 8}{2\alpha + 8}; \end{aligned}$$

**Case 4:** If  $\tau_{i+1} \geq \gamma_i$  and  $\frac{1}{4} < \gamma_i \leq \frac{1}{2}$ , with respect to Definition 1, we have

$$\begin{aligned} \frac{d_{\Delta}(S_1^{i+1} \cup S_2^{i+1}, S^*)}{d_{\Delta}(S_1^i \cup S_2^i, S^*)} &\leq \frac{\frac{1}{8} Pr(S_1^i \oplus S_2^i) + \tau_{i+1} Pr(S_1^{i+1} \oplus S_2^{i+1}) + \frac{1}{\alpha} Pr(S_1^i \oplus S_2^i)}{(\frac{1}{2} + \gamma_i) Pr(S_1^i \oplus S_2^i) + \frac{1}{\alpha} Pr(S_1^i \oplus S_2^i)} \\ &\leq \frac{5\alpha + 8}{6\alpha + 8}; \end{aligned}$$

**Case 5:** If  $\tau_{i+1} < \gamma_i$  and  $-\frac{1}{4} \leq \gamma_i \leq 0$ , with respect to Definition 1, we have

$$\begin{aligned} \frac{d_{\Delta}(S_1^{i+1} \cup S_2^{i+1}, S^*)}{d_{\Delta}(S_1^i \cup S_2^i, S^*)} &\leq \frac{\frac{1}{8} Pr(S_1^i \oplus S_2^i) + \frac{1}{\alpha} Pr(S_1^i \oplus S_2^i)}{(\frac{1}{2} + \gamma_i) Pr(S_1^i \oplus S_2^i) + \frac{1}{\alpha} Pr(S_1^i \oplus S_2^i)} \\ &\leq \frac{\alpha + 8}{2\alpha + 8}; \end{aligned}$$

**Case 6:** If  $\tau_{i+1} < \gamma_i$  and  $-\frac{1}{2} \leq \gamma_i < -\frac{1}{4}$ , with respect to Definition 1, we have

$$\begin{aligned} \frac{d_\Delta(S_1^{i+1} \cap S_2^{i+1}, S^*)}{d_\Delta(S_1^i \cap S_2^i, S^*)} &\leq \frac{\frac{1}{8}Pr(S_1^i \oplus S_2^i) + |\tau_{i+1}|Pr(S_1^{i+1} \oplus S_2^{i+1}) + \frac{1}{\alpha}Pr(S_1^i \oplus S_2^i)}{(\frac{1}{2} + |\gamma_i|)Pr(S_1^i \oplus S_2^i) + \frac{1}{\alpha}Pr(S_1^i \oplus S_2^i)} \\ &\leq \frac{5\alpha + 8}{6\alpha + 8}; \end{aligned}$$

**Case 7:** If  $\tau_{i+1} \leq -\gamma_i$  and  $0 \leq \gamma_i \leq \frac{1}{2}$ , with respect to Definition 1, we have

$$\begin{aligned} \frac{d_\Delta(S_1^{i+1} \cup S_2^{i+1}, S^*)}{d_\Delta(S_1^i \cup S_2^i, S^*)} &\leq \frac{\frac{1}{8}Pr(S_1^i \oplus S_2^i) + \frac{1}{\alpha}Pr(S_1^i \oplus S_2^i)}{(\frac{1}{2} + \gamma_i)Pr(S_1^i \oplus S_2^i) + \frac{1}{\alpha}Pr(S_1^i \oplus S_2^i)} \\ &\leq \frac{\alpha + 8}{4\alpha + 8}; \end{aligned}$$

**Case 8:** If  $\tau_{i+1} > -\gamma_i$  and  $-\frac{1}{2} \leq \gamma_i \leq 0$ , with respect to Definition 1, we have

$$\begin{aligned} \frac{d_\Delta(S_1^{i+1} \cap S_2^{i+1}, S^*)}{d_\Delta(S_1^i \cap S_2^i, S^*)} &\leq \frac{\frac{1}{8}Pr(S_1^i \oplus S_2^i) + \frac{1}{\alpha}Pr(S_1^i \oplus S_2^i)}{(\frac{1}{2} + |\gamma_i|)Pr(S_1^i \oplus S_2^i) + \frac{1}{\alpha}Pr(S_1^i \oplus S_2^i)} \\ &\leq \frac{\alpha + 8}{4\alpha + 8}. \end{aligned}$$

Thus, after the  $(i + 1)$ -th round, either  $\frac{d_\Delta(S_1^{i+1} \cap S_2^{i+1}, S^*)}{d_\Delta(S_1^i \cap S_2^i, S^*)} \leq \frac{5\alpha+8}{6\alpha+8}$  or  $\frac{d_\Delta(S_1^{i+1} \cup S_2^{i+1}, S^*)}{d_\Delta(S_1^i \cup S_2^i, S^*)} \leq \frac{5\alpha+8}{6\alpha+8}$

holds. Hence, we have  $d_\Delta(S_1^s \cap S_2^s, S^*) \leq \frac{1}{8} \left( \frac{5\alpha+8}{6\alpha+8} \right)^{s/2}$  or  $d_\Delta(S_1^s \cup S_2^s, S^*) \leq \frac{1}{8} \left( \frac{5\alpha+8}{6\alpha+8} \right)^{s/2}$

with probability at least  $1 - \delta$ . When  $s = \lceil \frac{2 \log \frac{1}{\delta}}{\log \frac{1}{C_2}} \rceil$ , where  $C_2 = \frac{5\alpha+8}{6\alpha+8}$  is a constant less than 1, we have either  $d_\Delta(S_1^s \cap S_2^s, S^*) \leq \epsilon$  or  $d_\Delta(S_1^s \cup S_2^s, S^*) \leq \epsilon$  with probability at least  $1 - \delta$ . Thus, considering  $R(h_+^i) - R(S^*) = R(S_1^i \cap S_2^i) - R(S^*) \leq d_\Delta(S_1^i \cap S_2^i, S^*)$  and  $R(h_-^i) - R(S^*) = R(S_1^i \cup S_2^i) - R(S^*) \leq d_\Delta(S_1^i \cup S_2^i, S^*)$ , we have either  $R(h_+^s) \leq R(S^*) + \epsilon$  or  $R(h_-^s) \leq R(S^*) + \epsilon$ .  $\square$

**Proof of Lemma 2.** We apply  $S_1^s$  and  $S_2^s$  to the unlabeled instances set and identify the contention point set. Then we query for labels of  $\frac{2 \log(\frac{4}{\delta})}{\beta^2}$  instances drawn randomly from the contention points set. With these labels we estimate the empirical value  $\hat{P}_1$  of  $\frac{Pr(\{x: x \in S_1^s \oplus S_2^s \wedge y(x)=1\})}{Pr(S_1^s \oplus S_2^s)}$  and the empirical value  $\hat{P}_2$  of  $\frac{Pr(\{x: x \in S_1^s \oplus S_2^s \wedge y(x)=0\})}{Pr(S_1^s \oplus S_2^s)}$ . By Chernoff bound, with number of  $\frac{2 \log(\frac{4}{\delta})}{\beta^2}$  labels we have the following two equations with probability at least  $1 - \delta$ .

$$\begin{aligned} \hat{P}_1 &\in \left[ \frac{Pr(\{x : x \in S_1^s \oplus S_2^s \wedge y(x) = 1\})}{Pr(S_1^s \oplus S_2^s)} - \frac{\beta}{2}, \frac{Pr(\{x : x \in S_1^s \oplus S_2^s \wedge y(x) = 1\})}{Pr(S_1^s \oplus S_2^s)} + \frac{\beta}{2} \right] \\ \hat{P}_2 &\in \left[ \frac{Pr(\{x : x \in S_1^s \oplus S_2^s \wedge y(x) = 0\})}{Pr(S_1^s \oplus S_2^s)} - \frac{\beta}{2}, \frac{Pr(\{x : x \in S_1^s \oplus S_2^s \wedge y(x) = 0\})}{Pr(S_1^s \oplus S_2^s)} + \frac{\beta}{2} \right] \end{aligned}$$

If  $\hat{P}_1 \leq \hat{P}_2$ , we get  $Pr(\{x : x \in S_1^s \oplus S_2^s \wedge y(x) = 1\}) \leq Pr(\{x : x \in S_1^s \oplus S_2^s \wedge y(x) = 0\})$  with probability at least  $1 - \delta$ ; otherwise, we get  $Pr(\{x : x \in S_1^s \oplus S_2^s \wedge y(x) = 1\}) > Pr(\{x : x \in S_1^s \oplus S_2^s \wedge y(x) = 0\})$  with probability at least  $1 - \delta$ .  $\square$

**Proof of Theorem 2.** According to Theorem 1, by requesting  $\tilde{O}(\log \frac{1}{\epsilon})$  labels the multi-view active learning in Table 1 can get either  $R(h_+^s) \leq R(S^*) + \epsilon$  or  $R(h_-^s) \leq R(S^*) + \epsilon$  with probability at least  $1 - \frac{\delta}{2}$ . According to Lemma 2, by requesting  $\frac{2 \log(\frac{8}{\delta})}{\beta^2}$  labels we can decide correctly whether  $Pr(\{x : x \in S_1^s \oplus S_2^s \wedge y(x) = 1\})$  or  $Pr(\{x : x \in S_1^s \oplus S_2^s \wedge y(x) = 0\})$  is smaller with probability at least  $1 - \frac{\delta}{2}$ .

**Case 1:** If  $Pr(\{x : x \in S_1^s \oplus S_2^s \wedge y(x) = 1\}) \leq Pr(\{x : x \in S_1^s \oplus S_2^s \wedge y(x) = 0\})$ , we have  $R(h_-^s) \leq R(h_+^s)$ . Thus, we get  $R(h_-^s) \leq R(S^*) + \epsilon$  with probability at least  $1 - \delta$ .

**Case 2:** If  $Pr(\{x : x \in S_1^s \oplus S_2^s \wedge y(x) = 1\}) > Pr(\{x : x \in S_1^s \oplus S_2^s \wedge y(x) = 0\})$ , we have  $R(h_+^s) < R(h_-^s)$ . Thus, we get  $R(h_+^s) \leq R(S^*) + \epsilon$  with probability at least  $1 - \delta$ .

The total number of labels to be requested is  $\tilde{O}(\log \frac{1}{\epsilon}) + \frac{2\log(\frac{8}{\delta})}{\beta^2} = \tilde{O}(\log \frac{1}{\epsilon})$ .  $\square$

**Proof of Theorem 3.** Since  $Pr(S_1^s \oplus S_2^s) \leq 1$ , with the following equation

$$\left| \frac{Pr(\{x : x \in S_1^s \oplus S_2^s \wedge y(x) = 1\})}{Pr(S_1^s \oplus S_2^s)} - \frac{Pr(\{x : x \in S_1^s \oplus S_2^s \wedge y(x) = 0\})}{Pr(S_1^s \oplus S_2^s)} \right| = O(\epsilon)$$

we have  $|Pr(\{x : x \in S_1^s \oplus S_2^s \wedge y(x) = 1\}) - Pr(\{x : x \in S_1^s \oplus S_2^s \wedge y(x) = 0\})| = O(\epsilon)$ . So it is easy to get  $|R(h_+^s) - R(h_-^s)| = O(\epsilon)$ . According to Theorem 1, by requesting  $\tilde{O}(\log \frac{1}{\epsilon})$  labels we can get either  $R(h_+^s) \leq R(S^*) + \epsilon$  or  $R(h_-^s) \leq R(S^*) + \epsilon$  with probability at least  $1 - \delta$ . Thus, we get that  $h_+^s$  and  $h_-^s$  satisfy either (a) or (b) with probability at least  $1 - \delta$ .  $\square$

**Proof of Theorem 5.** According to Theorem 4, by requesting  $\tilde{O}(\log \frac{1}{\epsilon})$  labels the multi-view active learning in Table 1 can get either  $R(h_+^s) \leq R(S_1^* \cap S_2^*) + \epsilon$  or  $R(h_-^s) \leq R(S_1^* \cap S_2^*) + \epsilon$  with probability at least  $1 - \frac{\delta}{2}$ . According to Lemma 2, by requesting  $\frac{2\log(\frac{8}{\delta})}{\beta^2}$  labels we can decide correctly whether  $Pr(\{x : x \in S_1^s \oplus S_2^s \wedge y(x) = 1\})$  or  $Pr(\{x : x \in S_1^s \oplus S_2^s \wedge y(x) = 0\})$  is smaller with probability at least  $1 - \frac{\delta}{2}$ .

**Case 1:** If  $Pr(\{x : x \in S_1^s \oplus S_2^s \wedge y(x) = 1\}) \leq Pr(\{x : x \in S_1^s \oplus S_2^s \wedge y(x) = 0\})$ , we have  $R(h_-^s) \leq R(h_+^s)$ . Thus, we get  $R(h_-^s) \leq R(S_1^* \cap S_2^*) + \epsilon$  with probability at least  $1 - \delta$ .

**Case 2:** If  $Pr(\{x : x \in S_1^s \oplus S_2^s \wedge y(x) = 1\}) > Pr(\{x : x \in S_1^s \oplus S_2^s \wedge y(x) = 0\})$ , we have  $R(h_+^s) < R(h_-^s)$ . Thus, we get  $R(h_+^s) \leq R(S_1^* \cap S_2^*) + \epsilon$  with probability at least  $1 - \delta$ .

The total number of labels to be requested is  $\tilde{O}(\log \frac{1}{\epsilon}) + \frac{2\log(\frac{8}{\delta})}{\beta^2} = \tilde{O}(\log \frac{1}{\epsilon})$ .  $\square$

**Proof of Corollary 1.** According to Theorem 5 we know that by requesting  $\tilde{O}(\log \frac{1}{\epsilon})$  labels the multi-view active learning in Table 1 will generate a classifier whose error rate is no larger than  $R(S_1^* \cap S_2^*) + \frac{\epsilon}{2}$  with probability at least  $1 - \delta$ . Considering that

$$R(S_1^* \cap S_2^*) - R(S_v^*) = \int_{(S_1^* \cap S_2^*) \Delta S_v^*} |2\varphi_v(x_v) - 1| p_{x_v} dx_v \leq Pr(S_1^* \oplus S_2^*),$$

we have  $R(S_1^* \cap S_2^*) \leq R(S_v^*) + \frac{\epsilon}{2}$ . Thus, we get that  $R(S_1^* \cap S_2^*) + \frac{\epsilon}{2}$  is no larger than  $R(S_v^*) + \epsilon$ .  $\square$

**Proof of Theorem 6.** After the  $i$ -th round in Table 2, the number of training examples in  $\mathcal{L}$  is  $\sum_{b=0}^i 2^b m_i = (2^{i+1} - 1)m_i$ . While in the  $(i+1)$ -th round, we randomly query  $(2^{i+1} - 1)m_i$  labels from the region of  $\overline{Q_i}$  and add them into  $\mathcal{L}$ . So in the  $(i+1)$ -th round, the number of training examples for  $S_v^{i+1}$  ( $v = 1, 2$ ) drawn randomly from region of  $\overline{Q_i}$  is larger than the number of whole training examples for  $S_v^i$ . Since the optimal Bayes classifier  $c_v$  belongs to  $\mathcal{H}_v$ , according to the standard PAC-model, it is easy to know that  $d(S_v^{i+1}|\overline{Q_i}, S^*|\overline{Q_i}) \leq d(S_v^i|\overline{Q_i}, S^*|\overline{Q_i})$  can be met for any  $\varphi_v$ , where  $d(S_v|\overline{Q_i}, S^*|\overline{Q_i})$  is defined as

$$d(S_v|\overline{Q_i}, S^*|\overline{Q_i}) \triangleq R(S_v|\overline{Q_i}) - R(S^*|\overline{Q_i}) = \int_{(S_v \cap \overline{Q_i}) \Delta (S^* \cap \overline{Q_i})} |2\varphi_v(x_v) - 1| p_{x_v} dx_v / Pr(\overline{Q_i}).$$

So, by setting  $\varphi_v \in \{0, 1\}$ , we get  $d_\Delta(S_v^{i+1}|\overline{Q_i}, S^*|\overline{Q_i}) \leq d_\Delta(S_v^i|\overline{Q_i}, S^*|\overline{Q_i})$ , which implies the non-degradation condition. Thus, with the proof of Theorem 1, we get Theorem 6 proved.  $\square$

**Proof of Theorem 7.** According to Theorem 6, by requesting  $\tilde{O}(\frac{1}{\epsilon})$  labels the multi-view active learning in Table 2 will generate two classifiers  $h_+^s$  and  $h_-^s$ , at least one of which is with error rate no larger than  $R(S^*) + \epsilon$  with probability at least  $1 - \delta$ . Similarly to the proof of Theorem 2, we get Theorem 7 proved.  $\square$

**Proof of Theorem 8.** According to Theorem 6, by requesting  $\tilde{O}(\frac{1}{\epsilon})$  labels the multi-view active learning in Table 2 will generate two classifiers  $h_+^s$  and  $h_-^s$ , at least one of which is with error rate no larger than  $R(S^*) + \epsilon$  with probability at least  $1 - \delta$ . Similarly to the proof of Theorem 3, we get Theorem 8 proved.  $\square$

**Proof of Theorem 9.** Similarly to the proof of Theorem 4 and Theorem 6, we know that by requesting  $\tilde{O}(\frac{1}{\epsilon})$  labels the multi-view active learning in Table 2 can get either  $R(h_+^s) \leq R(S_1^* \cap S_2^*) + \epsilon$  or  $R(h_-^s) \leq R(S_1^* \cap S_2^*) + \epsilon$  with probability at least  $1 - \frac{\delta}{2}$ . According to Lemma 2, by requesting  $\frac{2 \log(\frac{8}{\delta})}{\beta^2}$  labels we can decide correctly whether  $R(h_+^s)$  or  $R(h_-^s)$  is smaller with probability at least  $1 - \frac{\delta}{2}$ . Thus, we can get a classifiers whose error rate is no larger than  $R(S_1^* \cap S_2^*) + \epsilon$  with probability at least  $1 - \delta$ . The total number of labels to be requested is  $\tilde{O}(\frac{1}{\epsilon}) + \frac{2 \log(\frac{8}{\delta})}{\beta^2} = \tilde{O}(\frac{1}{\epsilon})$ .  $\square$

**Proof of Corollary 2.** According to Theorem 9 we know that by requesting  $\tilde{O}(\frac{1}{\epsilon})$  labels the multi-view active learning in Table 2 will generate a classifier whose error rate is no larger than  $R(S_1^* \cap S_2^*) + \frac{\epsilon}{2}$  with probability at least  $1 - \delta$ . With the proof of Corollary 1, we get that  $R(S_1^* \cap S_2^*) + \frac{\epsilon}{2}$  is no larger than  $R(S_v^*) + \epsilon$ .  $\square$
